# Supplementary material
Source: MDPI journal article supplement (https://www.mdpi.com/2073-4441/14/14/2247)
Supplement: s1 [file s1]

## Supplementary Materials

### 1. Quality assurance and quality control (QA/QC)

**Table S1** The information on method assurance.

| Heavy metals | Detection instrument    | Detection limit(mg/kg) | MB | DUP RPD% | LCS Recovery% | Standard value(mg/kg) | Testing value(mg/kg) |
|--------------|-------------------------|------------------------|----|----------|---------------|-----------------------|----------------------|
| Hg           | AFS8530                 | 0.002                  | ND | 1        | 94            | 0.017±0.003           | 0.019                |
| Pb           | PerkinElmer,            | 10                     | ND | 0        | 99            | 21±2                  | 23                   |
| Zn           | PinAAcle900             | 1                      | ND | 0        | 96            | 68±4                  | 71                   |
| Cr           |                         | 4                      | ND | 3        | 94            | 68±6                  | 69                   |
| Cu           |                         | 1                      | ND | 1        | 99            | 24.3±1.2              | 23.4                 |
| Ni           |                         | 3                      | ND | 0        | 104           | 31.5±1.8              | 31                   |
| Cd           | PerkinElmer, NexION 350 | 0.01                   | ND | 22       | 106           | 0.13±0.02             | 0.12                 |

MB = method blank.

### 2. Soil background values ( $B_n$ ) in Jiangsu Province

**Table S2.** Soil background values ( $B_n$ ) in Jiangsu Province [1] (mg/kg).

|       | Cu   | Zn   | Pb | Cd    | Cr   | Ni   | Hg    | As  |
|-------|------|------|----|-------|------|------|-------|-----|
| $B_n$ | 23.4 | 64.8 | 22 | 0.085 | 75.6 | 32.8 | 0.025 | 9.4 |

### 3. Pollution levels associated with the geoaccumulation index ( $I_{geo}$ ) of the metals in the sediment

**Table S3.** Pollution levels associated with the geoaccumulation index ( $I_{geo}$ ) of the metals in sediment [2,3].

| $I_{geo}$ class | $I_{geo}$ value      | Quality of the sediment                  |
|-----------------|----------------------|------------------------------------------|
| 0               | $I_{geo} \leq 0$     | Not contaminated                         |
| 1               | $0 < I_{geo} \leq 1$ | Not contaminated-moderately contaminated |
| 2               | $1 < I_{geo} \leq 2$ | Moderately contaminated                  |
| 3               | $2 < I_{geo} \leq 3$ | Moderately to highly contaminated        |
| 4               | $3 < I_{geo} \leq 4$ | Highly contaminated                      |
| 5               | $4 < I_{geo} \leq 5$ | Highly to extremely contaminated         |
| 6               | $I_{geo} > 5$        | Extremely contaminated                   |

### 4. Screening levels for heavy metals in foreign countries

**Table S4.** Critical limits (mg/kg) for heavy metals in soils in some foreign countries [4].

| Country | Pb    | Cd  | Cu | Zn  | Ni | Cr | Hg      |
|---------|-------|-----|----|-----|----|----|---------|
| Denmark | 40    | 0.3 | 30 | 100 | 10 | 50 | 0.1     |
| Sweden  | 30-60 | --  | -- | --  | -- |    | 0.2-0.3 |

|                |        |         |       |        |       |        |         |
|----------------|--------|---------|-------|--------|-------|--------|---------|
| Finland        | 38     | 0.3     | 32    | 90     | 40    | 80     | 0.2     |
| Netherlands    | 85     | 0.8     | 36    | 140    | 35    | 100    | 0.3     |
| Germany        | 40-100 | 0.4-1.5 | 20-60 | 60-200 | 15-70 | 30-100 | 0.1-1.0 |
| Switzerland    | 50     | 0.8     | 50    | 200    | 50    | 75     | 0.8     |
| Czech Republic | 70     | 0.4     | 70    | 150    | 60    | 130    | 0.4     |
| Eastern Europe | 32     | 1       | 55    | 100    | 85    | 90     | 2.1     |
| Ireland        | 50     | 1.0     | 50    | 150    | 30    | 100    | 1.0     |
| Canada         | 25     | 0.5     | 30    | 50     | 20    | 20     | 0.1     |

**Table S5.** Ecological Soil Screening Levels (Eco-SSLs, mg/kg dry weight) for heavy metals in soil from USEPA.

| Heavy metals | Plant | Soil Invertebrates | Avian                   | Mammalian                |
|--------------|-------|--------------------|-------------------------|--------------------------|
| Zn[5]        | 160   | 120                | 46                      | 79                       |
| Ni[6]        | 38    | 280                | 210                     | 130                      |
| Pb[7]        | 120   | 1700               | 11                      | 56                       |
| Cu[8]        | 70    | 80                 | 28                      | 48                       |
| Cr[9]        | NA    | NA                 | Cr(III)-26<br>Cr(VI)-NA | Cr(III)-34<br>Cr(VI)-130 |
| Cd[10]       | 32    | 140                | 0.77                    | 0.36                     |
| Hg           | NA    | NA                 | NA                      | NA                       |

NA = not available. Data were insufficient to derive an Eco-SSL.

## 5. Screening levels for heavy metals in China

The heavy metal levels of sediment in the public river were evaluated in accordance with the Chinese regulations (Table S6). *Planting Soil for Greening (CJ/T 340-2016)* (PSG) separated the quality of planting soils into four classes, in which class III is suitable for green areas with little contact with people, such as a road green belt, factory attached green belt and other green belt or shelter forest with potential pollution source. *Soil Environmental Quality: Risk Control Standard for Soil Contamination of Agricultural Land (GB15618-2018)* (SEQA) specified the risk screening values and intervention values of agricultural soil for heavy metals, BHC, DDT and benzopyrene. Two soil types were sorted, namely paddy field and others. *Soil Environmental Quality: Risk Control Standard for Soil Contamination of Development Land (GB36600-2018)* (SEQD) stipulated the risk screening values and intervention values of the soil pollution risk of construction land for the protection of human health, categorizing development land into two classes. Class II covered the land for industrial use, logistics and storage, commercial service facilities, road and transportation facilities, public facilities, public management and public services, land for green space and squares, etc.

**Table S6.** Screening values (mg/kg) for heavy metals in soil in the national standard of China.

| Species | 《Planting soil for greening》<br>CJ/T 340-2016;<br>class III;<br>pH>6.5[11] | 《Soil environmental quality: Risk control standard for soil contamination of agricultural land》GB15618-2018; others;<br>pH>7.5[12] | 《Soil environmental quality: Risk control standard for soil contamination of development land》 |
|---------|----------------------------------------------------------------------------|------------------------------------------------------------------------------------------------------------------------------------|------------------------------------------------------------------------------------------------|
|---------|----------------------------------------------------------------------------|------------------------------------------------------------------------------------------------------------------------------------|------------------------------------------------------------------------------------------------|

|    |     |     |        |
|----|-----|-----|--------|
| Hg | 1.5 | 3.4 | 38     |
| Pb | 450 | 170 | 800    |
| Zn | 500 | 300 | /      |
| Cr | 250 | 250 | /      |
| Cu | 400 | 100 | 18,000 |
| Ni | 150 | 190 | 900    |
| Cd | 1.2 | 0.6 | 65     |

National standard of China for groundwater and surface water were used to assess the risk of leaching behavior in sediment (Table S7). *Standard for Groundwater Quality* (GB/T 14848-2017) (SGQ) divided the groundwater quality into five grades according to the quality of groundwater and the risk for human health. Grade IV referred to the high chemical content of groundwater, which is suitable for agriculture and some industrial water and can be used as drinking water after proper treatment. *Standard for surface water quality* (GB 3838-2002) (SSQ) classified surface water into five categories in order of the environmental functions and protection objectives of surface water quality. Grade IV were mainly applicable to the general industrial water areas and the recreational water areas where the human body is not in direct contact.

**Table S7.** Screening values ( $\mu\text{g/L}$ ) for heavy metals in water in the national standard of China.

| <i>Species</i> | <i>《Standard for groundwater quality》 GB/T 14848-2017; grade IV[14]</i> | <i>《Standard for surface water quality》 GB 3838-2002; grade IV[15]</i> |
|----------------|-------------------------------------------------------------------------|------------------------------------------------------------------------|
| Zn             | 5000                                                                    | 2000                                                                   |
| Cr(VI)         | 100                                                                     | 50                                                                     |
| Ni             | 100                                                                     | /                                                                      |
| Cd             | 100                                                                     | 5                                                                      |
